# Supplementary material
Source: PubMed Central journal article supplement (PMC3586220)
Supplement: NIHMS350009-supplement-01.pdf [file NIHMS350009-supplement-01.pdf]

## ***Metabolic flux analysis (MFA): description and assumptions***

For experimental validation of optimized tracer combinations, MFA was conducted using the elementary-metabolite unit (EMU-) based software package Metran as previously described (Antoniewicz et al., 2007; Metallo et al., 2009; Noguchi et al., 2009; Young et al., 2008). Briefly, a stoichiometric matrix,  $S$ , is formulated based on a simple network describing central carbon metabolism (Table 2). Simulated experimental measurements are generated for a given flux vector,  $v$ , assuming steady-state mass balances  $S \cdot v = 0$ . The simulated measurement values are compared with actual measurements of fluxes and mass isotopomer distributions (MIDs), and flux values are iteratively adjusted to minimize the squared residuals using an EMU-based algorithm (Antoniewicz et al., 2007; Young et al., 2008). Upon obtaining a global fit after performing at least 20 estimations, flux confidence intervals were determined by performing sensitivity analyses on each flux with respect to isotope measurements and the global fit (Antoniewicz et al., 2006). Finally, precision scores characterizing flux confidence intervals for each data set were calculated as previously described (Metallo et al., 2009). Flux estimations and confidence interval calculations are subject to the following assumptions:

1. Cellular metabolism and isotopic labeling are at steady state. Labeling of glycolytic and TCA cycle intermediates has been demonstrated to be constant after such time (Maier et al., 2008; Munger et al., 2008). Steady state labeling of organic and amino acids are demonstrated in Supplementary Figure 5 when using the combined  $[1,2-^{13}\text{C}_2]\text{glucose} + [\text{U}-^{13}\text{C}_5]\text{glutamine}$ .
2.  $\text{CO}_2$  is not balanced within the system, and unlabeled  $\text{CO}_2$  freely exchanges with  $\text{CO}_2$  pools in cells such that labeled  $\text{CO}_2$  is not necessarily reincorporated in carboxylation reactions.
3. Two separate compartments of pyruvate are assumed to exist, with cytosolic pyruvate used to generate lactate and mitochondrial pyruvate used for alanine synthesis. These compartments are exchangeable and required to fit the differential labeling observed in lactate and alanine. The former

being primarily glucose derived, and the latter containing more label from glutamine. The combining of these pools for measurements is recapitulated within the model through the use of “mixing fluxes,” which allow for the estimation of relative pool sizes for pyruvate measurements. All other measured metabolites are not compartmentalized between the mitochondria and cytosol and are therefore assumed to be isotopically equilibrated or predominantly in one compartment. Similarly, to better estimate fluxes and confidence intervals from the TCA cycle to pyruvate (i.e., pyruvate cycling), the primary enzyme assumed to catalyze this reaction was mitochondrial malic enzyme (converting malate to pyr.m). This assumption improved resolution of malic enzyme fluxes and allowed fits of pyruvate, lactate, and alanine data.

4. Fumarate and succinate are symmetric metabolites.

5. Dilution pools of several metabolites (glycine, serine, P5P, GLP, succinate) are assumed to exist.

These pools do not participate in central carbon metabolism and are accounted for using a dilution flux of unlabeled metabolite. Measurements are comprised of both pools. Isotopic enrichment of succinate pools from tracers is often observed to be decreased in tracer studies. Such effects are hypothesized to be due to intracellular compartmentalization (Chatham et al., 2003). Other dilution pools presumably arise from turnover of unlabeled biomass.

6. Amino acid fluxes to biomass were based on cell growth rate and published values of per cell amino acid abundances in mammalian cells, as previously described (Metallo et al., 2009).

Isotopic labeling was quantified in the metabolite ion fragments listed in Supplementary Table 1. In the case of redundant fragment measurements, mass isotopomer distributions (MIDs) were highly reproducible (i.e. within 1-2%). The formulas listed in Supplementary Table 1 were used to correct for natural isotope abundance using methods adapted from Fernandez et al (Fernandez et al., 1996).

**Supplementary Table 1: Metabolite ion fragments used in GC/MS analysis**

| <i>Measurement</i> | <i>Carbon atoms</i> | <i>Formula</i> |
|--------------------|---------------------|----------------|
| Pyr174             | Pyr.mnt @ 1 2 3     | C6H12O3NSi     |
| Lac233             | Lac @ 2 3           | C10H25O2Si2    |
| Lac261             | Lac @ 1 2 3         | C11H25O3Si2    |
| Ala232             | Ala @ 2 3           | C10H26ONSi2    |
| Ala260             | Ala @ 1 2 3         | C11H26O2NSi2   |
| Gly218             | Gly @ 2             | C9H24ONSi2     |
| Gly246             | Gly @ 1 2           | C10H24O2NSi2   |
| Suc289             | Suc.mnt @ 1 2 3 4   | C12H25O4Si2    |
| Fum287             | Fum @ 1 2 3 4       | C12H23O4Si2    |
| Ser288             | Ser @ 2 3           | C14H34NOSi2    |
| Ser302             | Ser @ 1 2           | C14H32O2NSi2   |
| Ser390             | Ser @ 1 2 3         | C17H40O3NSi3   |
| AKG346             | AKG @ 1 2 3 4 5     | C14H28O5NSi2   |
| Mal419             | Mal @ 1 2 3 4       | C18H39O5Si3    |
| Asp302             | Asp @ 1 2           | C14H32O2NSi2   |
| Asp390             | Asp @ 2 3 4         | C17H40O3NSi3   |
| Asp418             | Asp @ 1 2 3 4       | C18H40O4NSi3   |
| Glu330             | Glu @ 2 3 4 5       | C16H36O2NSi2   |
| Glu432             | Glu @ 1 2 3 4 5     | C19H42O4NSi3   |
| Gln431             | Gln @ 1 2 3 4 5     | C19H43N2O3Si3  |
| Cit459             | Cit @ 1 2 3 4 5 6   | C20H39O6Si3    |
| Cit591             | Cit @ 1 2 3 4 5 6   | C26H55O7Si4    |
| GLP357             | GLP.mnt @ 2 3       | C11H30O5Si3P   |
| GLP445             | GLP.mnt @ 1 2 3     | C14H38O6Si4P   |
| P5P357             | P5P @ 4 5           | C11H30O5Si3P   |
| P5P459             | P5P @ 3 4 5         | C15H40O6Si4P   |

Supplementary Table 2: Fluxes and 95% confidence intervals determined using optimized and selected tracers

|          | [1,2]gluc/[U]gln |          |          | [1]gluc/[U]gluc |          |          | [U]gln    |         |        |                                                                           |
|----------|------------------|----------|----------|-----------------|----------|----------|-----------|---------|--------|---------------------------------------------------------------------------|
|          | Flux             | LB       | UB       | Flux            | LB       | UB       | Flux      | LB      | UB     |                                                                           |
| R1       | 32.93            | 30.71    | 35.18    | 33.32           | 30.7     | 34.85    | 29.97     | 27.03   | 32.22  | Gluc.x (abcdef) → G6P (abcdef)                                            |
| R2       | 60.06            | 55.71    | 64.31    | 45.97           | 42.26    | 51.16    | 39.48     | 34.7    | 45.32  | Lac (abc) → Lac.x (abc)                                                   |
| R3       | 7.305            | 6.275    | 8.245    | 7.746           | 6.253    | 9.301    | 6.899     | 5.889   | 7.87   | Gln.x (abcde) → Gln (abcde)                                               |
| R4       | 4.02             | 3.339    | 4.704    | 3.497           | 2.833    | 4.194    | 3.673     | 2.989   | 4.349  | Glu (abcde) → Glu.x (abcde)                                               |
| R5       | 0.7061           | 0.5694   | 0.8429   | 0.7035          | 0.5663   | 0.8367   | 0.705     | 0.569   | 0.8373 | 0.18 Asp + 0.23 Glu + 0.17 Ser + 0.11 Gly + 0.15 Ala + 0.16 Gln → Biomass |
| R6 net   | 29.69            | 27.1     | 32.29    | 22.44           | 20.11    | 27.56    | 29.97     | 5.345   | 32.43  | G6P (abcdef) → F6P (abcdef)                                               |
| R6 exch  | 1.50E+05         | 0        | Inf      | 2.40E+05        | 49.35    | Inf      | -1.24E-04 | 0       | Inf    | G6P (abcdef) ↔ F6P (abcdef)                                               |
| R7       | 31.85            | 29.14    | 34.14    | 28.64           | 25.95    | 32.55    | 29.97     | 21.71   | 32.43  | F6P (abcdef) → DHAP (cba) + GAP (def)                                     |
| R8 net   | 29.86            | 26.23    | 32.09    | 28.64           | 24.15    | 31.38    | 29.97     | 21.7    | 32.91  | DHAP (abc) → GAP (abc)                                                    |
| R8 exch  | 1.00E-07         | 0        | Inf      | 160.3           | 16.41    | Inf      | 1.00E-07  | 0       | Inf    | DHAP (abc) ↔ GAP (abc)                                                    |
| R9 net   | 62.79            | 58.44    | 67.04    | 60.38           | 54.48    | 66.56    | 59.94     | 51.04   | 65.79  | GAP (abc) → 3PG (abc)                                                     |
| R9 exch  | 4.96E+01         | 0        | Inf      | 2.405           | 0        | Inf      | 1E-07     | 0       | Inf    | GAP (abc) ↔ 3PG (abc)                                                     |
| R10      | 62.67            | 58.32    | 66.89    | 60.29           | 54.39    | 66.47    | 59.94     | 51.04   | 65.83  | 3PG (abc) → Pyr.c (abc)                                                   |
| R11 net  | 60.06            | 55.71    | 64.31    | 45.97           | 42.26    | 51.16    | 39.48     | 34.7    | 45.32  | Pyr.c (abc) → Lac (abc)                                                   |
| R11 exch | 5.30E+01         | 0        | Inf      | 10.82           | 0        | Inf      | 5.741     | 0       | Inf    | Pyr.c (abc) ↔ Lac (abc)                                                   |
| R12 net  | 2.614            | 2.077    | 3.268    | 14.32           | 8.883    | 20.2     | 20.46     | 10.8    | 28.49  | Pyr.c (abc) → Pyr.m (abc)                                                 |
| R12 exch | 28.62            | 18.14    | 40.56    | 0.8165          | 0        | 4.502    | 16.12     | 8.738   | 25.01  | Pyr.c (abc) ↔ Pyr.m (abc)                                                 |
| R13 net  | 1.989            | 0        | 6.258    | 1.00E-07        | 0        | 6.027    | 1.00E-07  | 0       | 8.289  | DHAP (abc) → GLP (abc)                                                    |
| R13 exch | 3.70E+00         | 0        | Inf      | 0.2449          | 0        | Inf      | 1.182     | 0       | Inf    | DHAP (abc) ↔ GLP (abc)                                                    |
| R14      | 1.989            | 0        | 6.258    | 1.00E-07        | 0        | 6.027    | 1.00E-07  | 0       | 8.289  | GLP (abc) → GLP.x (abc)                                                   |
| R15      | 3.245            | 1.762    | 6.229    | 10.88           | 8.778    | 12.85    | 1.32E-05  | 0       | 24.86  | G6P (abcdef) → P5P (bcdef) + CO2 (a)                                      |
| R16 net  | 1.082            | 0.4174   | 1.393    | 3.099           | 1.999    | 4.035    | 1.43E-05  | -1.657  | 8.283  | P5P (abcde) + P5P (fghij) → S7P (abfghij) + GAP (cde)                     |
| R16 exch | 8.245            | 4.42     | 17.26    | 1E-07           | 0        | 1.342    | 1.607     | 0       | Inf    | P5P (abcde) + P5P (fghij) ↔ S7P (abfghij) + GAP (cde)                     |
| R17 net  | 1.082            | 0.4174   | 1.393    | 3.099           | 1.999    | 4.035    | 1.43E-05  | -1.657  | 8.283  | S7P (abcdefg) + GAP (hij) → F6P (abchij) + E4P (defg)                     |
| R17 exch | 0.9363           | 0        | 6.812    | 9.27E+01        | 45.75    | 260.7    | 3.809     | 0       | Inf    | S7P (abcdefg) + GAP (hij) ↔ F6P (abchij) + E4P (defg)                     |
| R18 net  | 1.082            | 0.4174   | 1.393    | 3.099           | 1.999    | 4.035    | 1.43E-05  | -1.657  | 8.283  | P5P (abcde) + E4P (fghi) → F6P (abfghi) + GAP (cde)                       |
| R18 exch | 1.00E-07         | 0        | 2.11     | 1.00E-07        | 0        | 1.589    | 1.01E-07  | 0       | Inf    | P5P (abcde) + E4P (fghi) ↔ F6P (abfghi) + GAP (cde)                       |
| R19      | 0.2672           | 0.1846   | 0.3574   | 1.00E-07        | 0        | 0.5225   | 1.00E-07  | 0       | 0.6987 | Pyr.m (abc) + CO2 (d) → OAA (abcd)                                        |
| R20 net  | 3.149            | 2.188    | 3.964    | 3.848           | 2.342    | 5.439    | 2.824     | 1.882   | 3.857  | Mal (abcd) → Pyr.m (abc) + CO2 (d)                                        |
| R20 exch | 0.477            | 0.3337   | 0.6381   | 1.929           | 1.282    | 2.672    | 1.411     | 0       | 2.211  | Mal (abcd) ↔ Pyr.m (abc) + CO2 (d)                                        |
| R21      | 5.657            | 4.52     | 6.803    | 18.06           | 11.33    | 25.41    | 23.18     | 12.63   | 31.99  | Pyr.m (abc) → AcCoA.m (bc) + CO2 (a)                                      |
| R22      | 5.657            | 4.52     | 6.803    | 18.06           | 11.33    | 25.41    | 23.18     | 12.63   | 31.99  | AcCoA.m (ab) + OAA (cdef) → Cit (fedbac)                                  |
| R23 net  | 1.343            | 1.118    | 1.58     | 3.118           | 2.491    | 3.847    | 1.292     | 0.8726  | 3.611  | Cit (abcdef) → AKG (abcde) + CO2 (f)                                      |
| R23 exch | 1.549            | 1.25     | 1.828    | 1.542           | 0.9025   | 2.375    | 0.7249    | 0.5003  | 1.255  | Cit (abcdef) ↔ AKG (abcde) + CO2 (f)                                      |
| R24      | 4.353            | 3.378    | 5.201    | 7.092           | 5.149    | 9.196    | 4.243     | 2.886   | 6.609  | AKG (abcde) → Suc (bcde) + CO2 (a)                                        |
| R25 net  | 4.353            | 3.378    | 5.201    | 7.092           | 5.149    | 9.196    | 4.243     | 2.886   | 6.609  | Suc (abcd) → Fum (abcd)                                                   |
| R25 exch | 0.315            | 0        | 1.736    | 2.51E-08        | 0        | 5.916    | 0.07754   | 0       | 1.159  | Suc (abcd) ↔ Fum (abcd)                                                   |
| R26 net  | 4.353            | 3.378    | 5.201    | 7.092           | 5.149    | 9.196    | 4.243     | 2.886   | 6.609  | Fum (abcd) → Mal (abcd)                                                   |
| R26 exch | 1.00E+07         | 92.46    | Inf      | 6.795           | 3.559    | 13.24    | 38.77     | 19.74   | 134    | Fum (abcd) ↔ Mal (abcd)                                                   |
| R27 net  | 1.203            | 0.9857   | 1.43     | 3.245           | 2.536    | 3.963    | 1.418     | 0.1038  | 3.661  | Mal (abcd) → OAA (abcd)                                                   |
| R27 exch | 229.8            | 51.04    | Inf      | 0.8836          | 0        | 5.386    | 1.00E+07  | 23.16   | Inf    | Mal (abcd) ↔ OAA (abcd)                                                   |
| R28      | 4.314            | 3.268    | 5.383    | 14.95           | 8.471    | 22.08    | 21.89     | 11.72   | 30.39  | Cit (abcdef) → AcCoA.c (ed) + OAA (fcba)                                  |
| R29      | 4.314            | 3.268    | 5.383    | 14.95           | 8.471    | 22.08    | 21.89     | 11.72   | 30.39  | AcCoA.c (ab) → FA (ab)                                                    |
| R30      | 0.1059           | 0.08541  | 0.1264   | 0.1055          | 0.08495  | 0.1255   | 0.1058    | 0.08535 | 0.1256 | Pyr.m (abc) + Glu (defgh) → Ala (abc) + AKG (defgh)                       |
| R31      | 0.1271           | 0.1025   | 0.1517   | 0.1266          | 0.1019   | 0.1506   | 0.1269    | 0.1024  | 0.1507 | OAA (abcd) + Glu (efghi) → Asp (abcd) + AKG (efghi)                       |
| R32      | 0.1191           | 0.09649  | 0.1425   | 0.08429         | 0.06776  | 0.1009   | -2.62E-06 | 0       | 0.2352 | 3PG (abc) + Glu (defgh) → Ser (abc) + AKG (defgh)                         |
| R33 net  | 0.008998         | 0.005345 | 0.0133   | 0.007286        | 0.003615 | 0.01145  | 0.07755   | 0       | 0.0921 | Ser (abc) → Gly (ab) + MEETHF (c)                                         |
| R33 exch | 0.004846         | 0.000985 | 0.008932 | 0.005285        | 0.001489 | 0.009385 | 0.1784    | 0       | Inf    | Ser (abc) ↔ Gly (ab) + MEETHF (c)                                         |
| R34      | 7.192            | 6.158    | 8.13     | 7.633           | 6.121    | 9.188    | 6.787     | 5.744   | 7.707  | Gln (abcde) → Glu (abcde)                                                 |
| R35 net  | 2.657            | 1.755    | 3.423    | 3.658           | 2.123    | 5.272    | 2.719     | 1.576   | 3.503  | Glu (abcde) → AKG (abcde)                                                 |
| R35 exch | 5.00E+04         | 119.2    | Inf      | 593.3           | 108.6    | Inf      | 1.00E-07  | 0       | Inf    | Glu (abcde) ↔ AKG (abcde)                                                 |
| R36      | 1.00E-07         | 0        | 3.239    | 1.581           | 0        | 4.415    | -2.97E-05 | 0       | 4.973  | P5P (abcde) → NTP (abcde)                                                 |
| R37      | 0.008998         | 0.005345 | 0.0133   | 0.007286        | 0.003615 | 0.01145  | 0.07755   | 0       | 0.0921 | MEETHF (a) → MEETHF.x (a)                                                 |
| R38      | 0.06867          | 0.05501  | 0.0826   | 0.0701          | 0.05615  | 0.08443  | 2.42E-06  | 0       | 0.0925 | Gly.p (ab) → Gly (ab)                                                     |
| R39      | 0.009976         | 0.005906 | 0.01471  | 0.04259         | 0.03394  | 0.05166  | 0.1974    | 0       | 0.2344 | Ser.p (abc) → Ser (abc)                                                   |
| R40      | 1                | 0        | 1        | 0.1413          | 0        | 1        | 1         | 0       | 1      | P5P.dil (abcde) → P5P.mnt (abcde)                                         |
| R41      | 1E-07            | 0        | 1        | 0.8587          | 0        | 1        | 1E-07     | 0       | 1      | 0 P5P (abcde) → P5P.mnt (abcde)                                           |
| R43      | 0.7787           | 0.512    | 0.8027   | 0.5637          | 0.5151   | 0.6237   | 0.4361    | 0       | 1      | GLP.dil (abc) → GLP.mnt (abc)                                             |
| R44      | 0.2213           | 0.1973   | 0.488    | 0.4363          | 0.3763   | 0.4849   | 0.5639    | 0       | 1      | 0 GLP (abc) → GLP.mnt (abc)                                               |
| R46      | 0.6061           | 0.577    | 0.6356   | 0.4807          | 0.3945   | 0.5654   | 0.187     | 0.1424  | 0.2232 | Suc.dil (abcd) → Suc.mnt (abcd)                                           |
| R47      | 0.3939           | 0.3644   | 0.423    | 0.5193          | 0.4346   | 0.6055   | 0.813     | 0.7768  | 0.8576 | 0 Suc (abcd) → Suc.mnt (abcd)                                             |
| R49      | 1                | 0.8851   | 1        | 1               | 0.9287   | 1        | 0.9455    | 0.7868  | 1      | 0 Pyr.c (abc) → Pyr.mnt (abc)                                             |
| R50      | -8.16E-05        | 0        | 0.1149   | 1.00E-07        | 0        | 0.07129  | 0.05448   | 0       | 0.2132 | 0 Pyr.m (abc) → Pyr.mnt (abc)                                             |

→ indicates net flux:  $(v_F - v_R)$ ; ↔ indicates exchange flux:  $\min(v_F, v_R)$ .

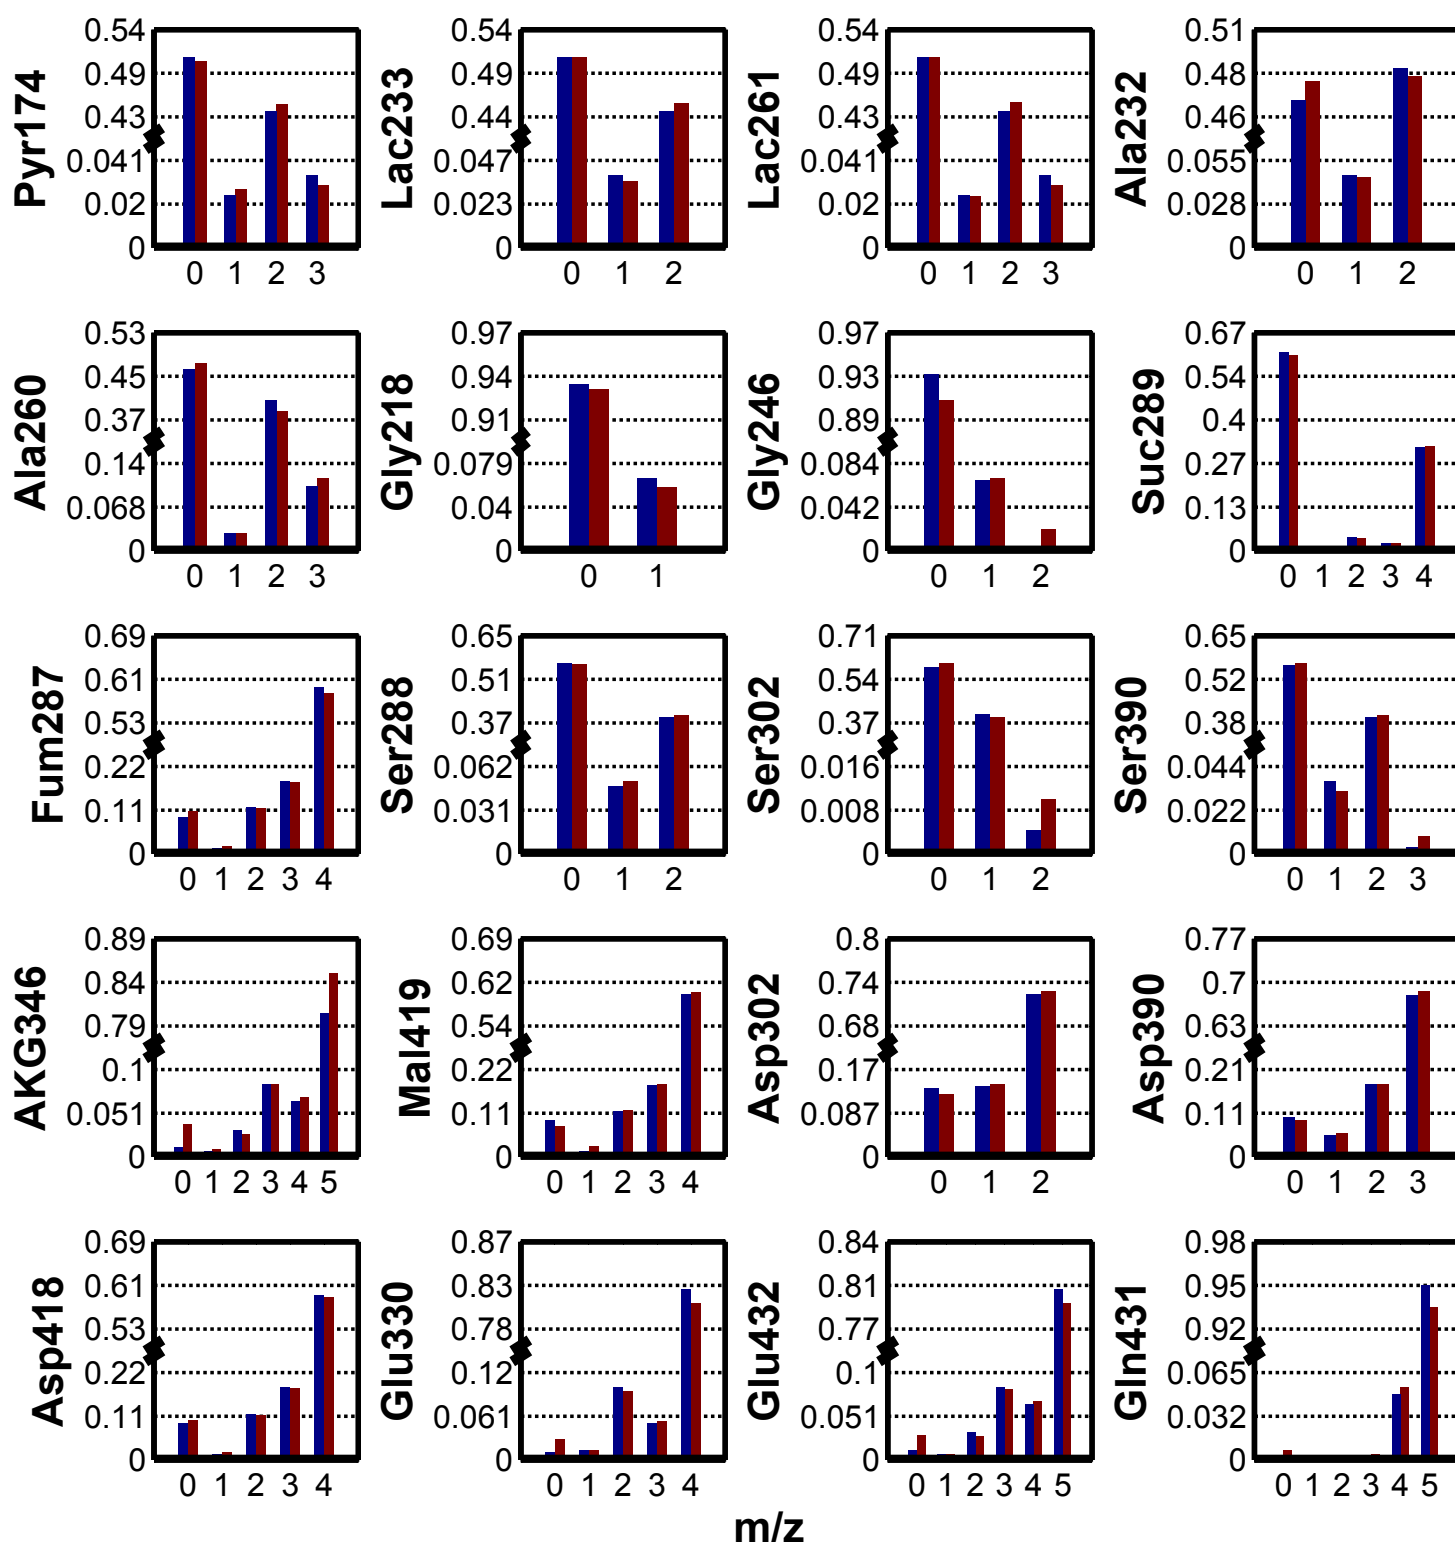

Supplementary Figure 1A: Simulated and measured MID values from MFA model using A549 cells cultured with a mixture of [1,2-<sup>13</sup>C<sub>2</sub>]glucose and [U-<sup>13</sup>C<sub>5</sub>]glutamine. Simulated values (blue) were obtained using Metran and the model fit (fluxes) listed in Supplementary Table 3. For measured values (red), labeling was determined via GC/MS and corrected for natural isotope abundance.

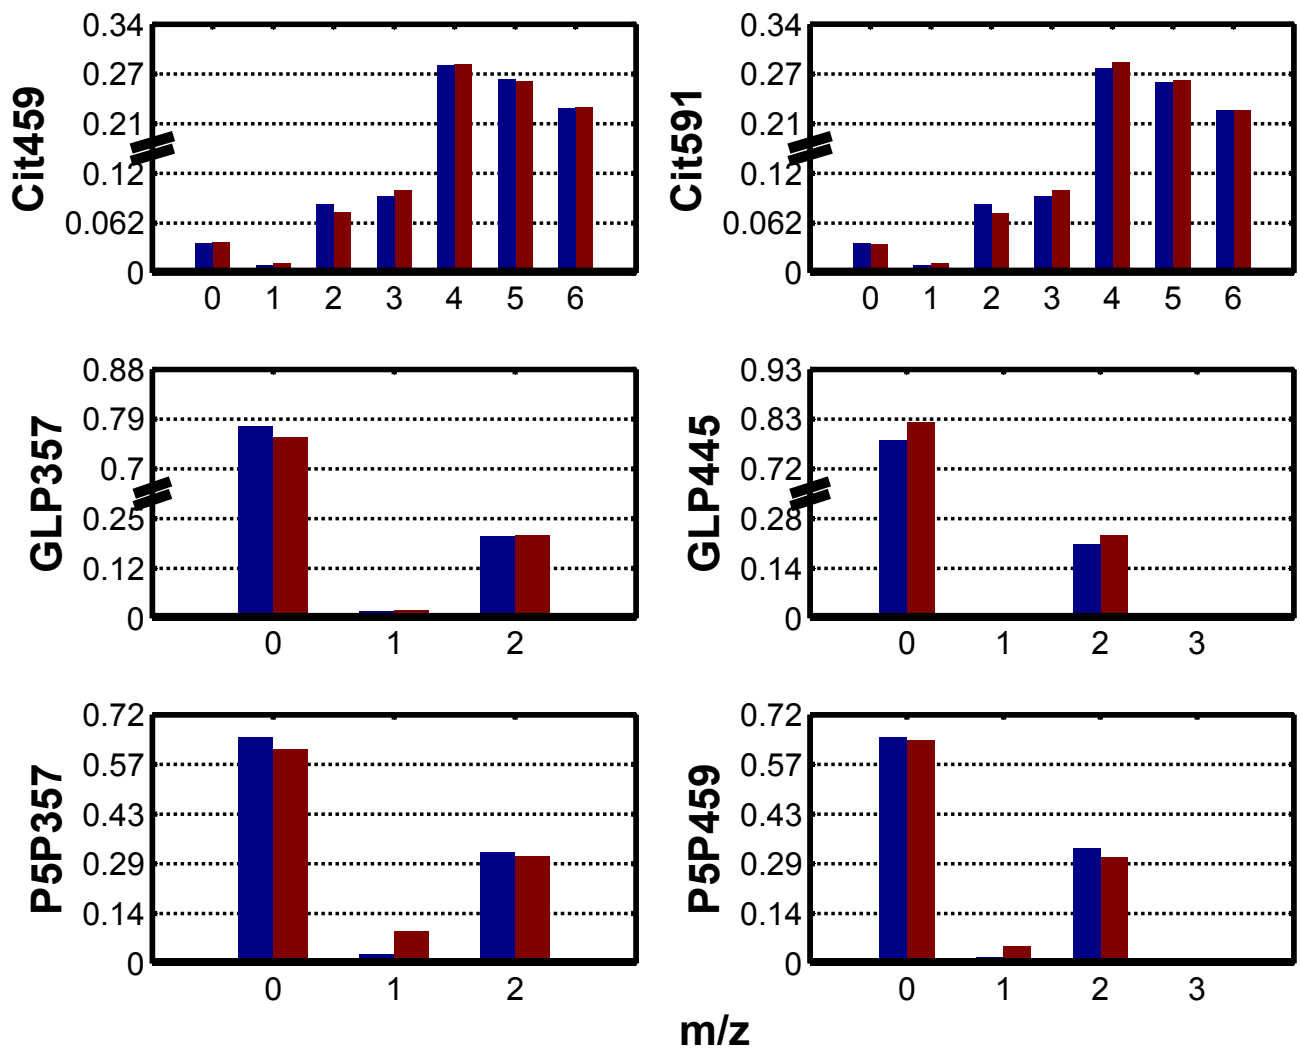

Supplementary Figure 1B: Simulated and measured MIDs from MFA model using A549 cells cultured with a mixture of [1,2-<sup>13</sup>C<sub>2</sub>]glucose and [U-<sup>13</sup>C<sub>5</sub>]glutamine. Simulated values (blue) were obtained using Metran and the model fit (fluxes) listed in Supplementary Table 3. For measured values (red), labeling was determined via GC/MS and corrected for natural isotope abundance.

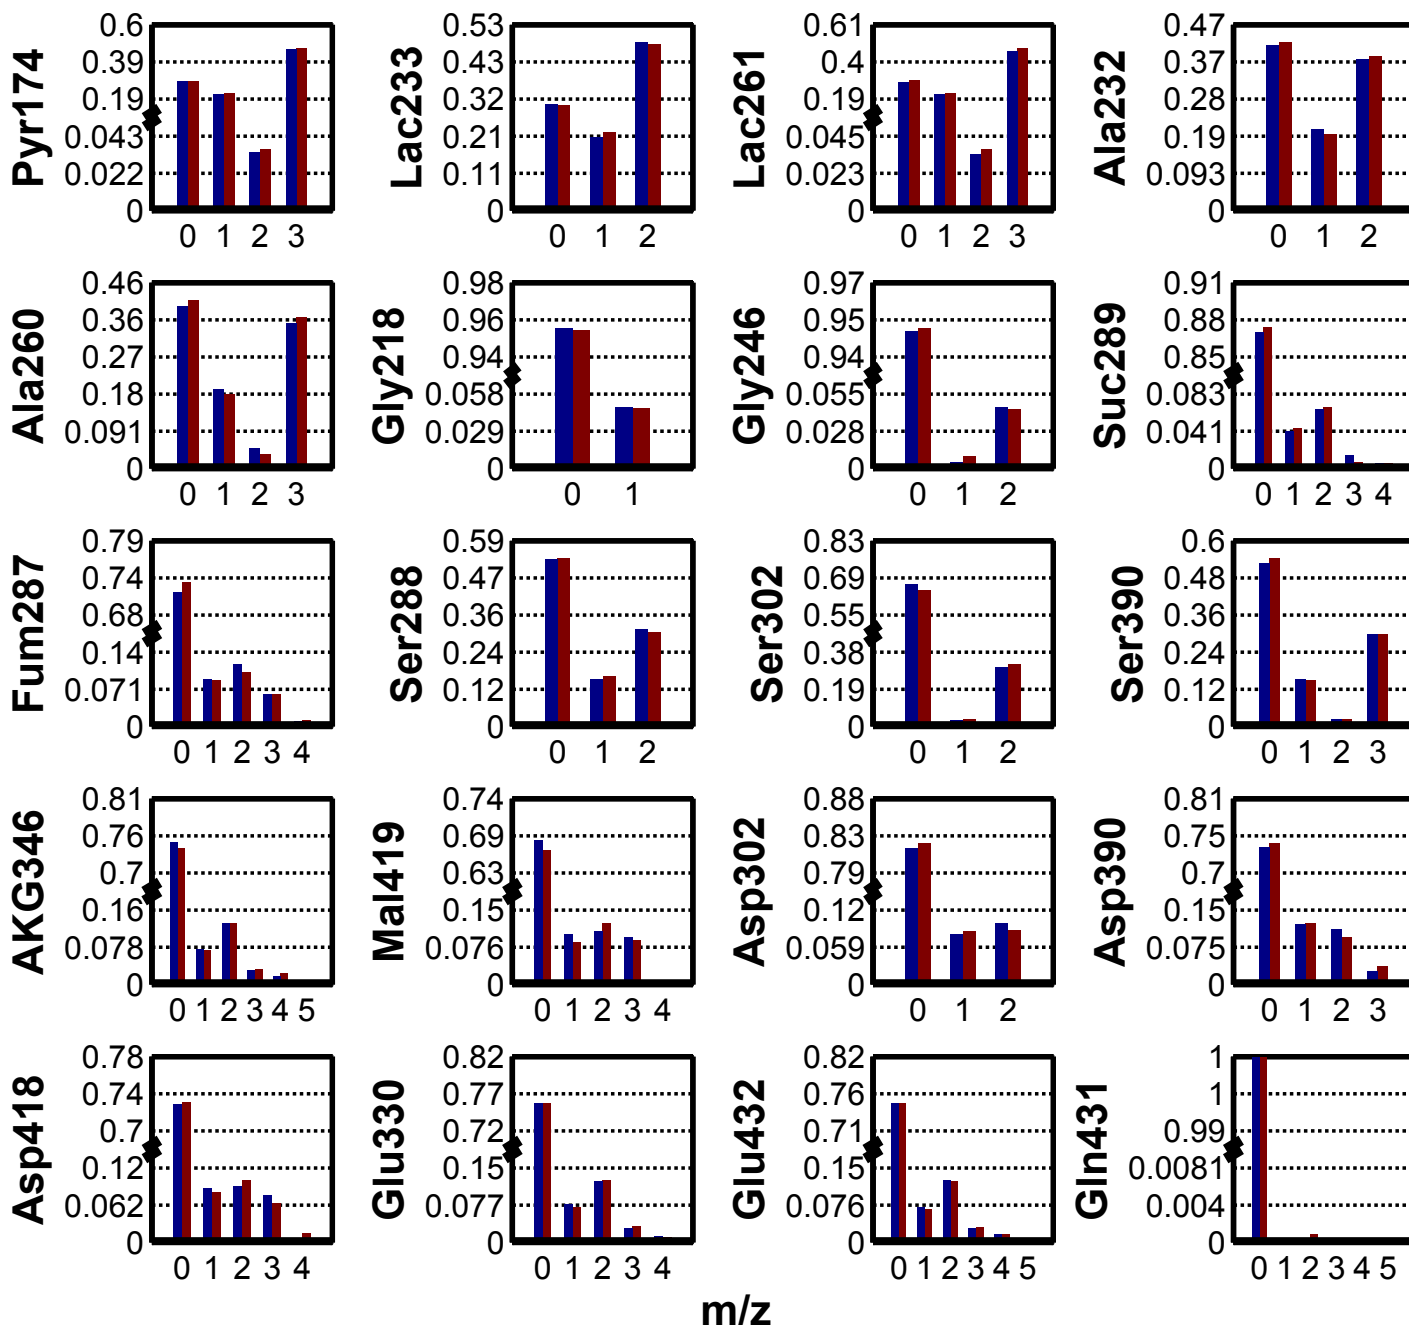

Supplementary Figure 2A: Simulated and measured MIDs from MFA model using A549 cells cultured with a 1:1 mixture of [U-<sup>13</sup>C<sub>6</sub>]glucose and [1-<sup>13</sup>C]glucose. Simulated values (blue) were obtained using Metran and the model fit (fluxes) listed in Supplementary Table 3. For measured values (red), labeling was determined via GC/MS and corrected for natural isotope abundance.

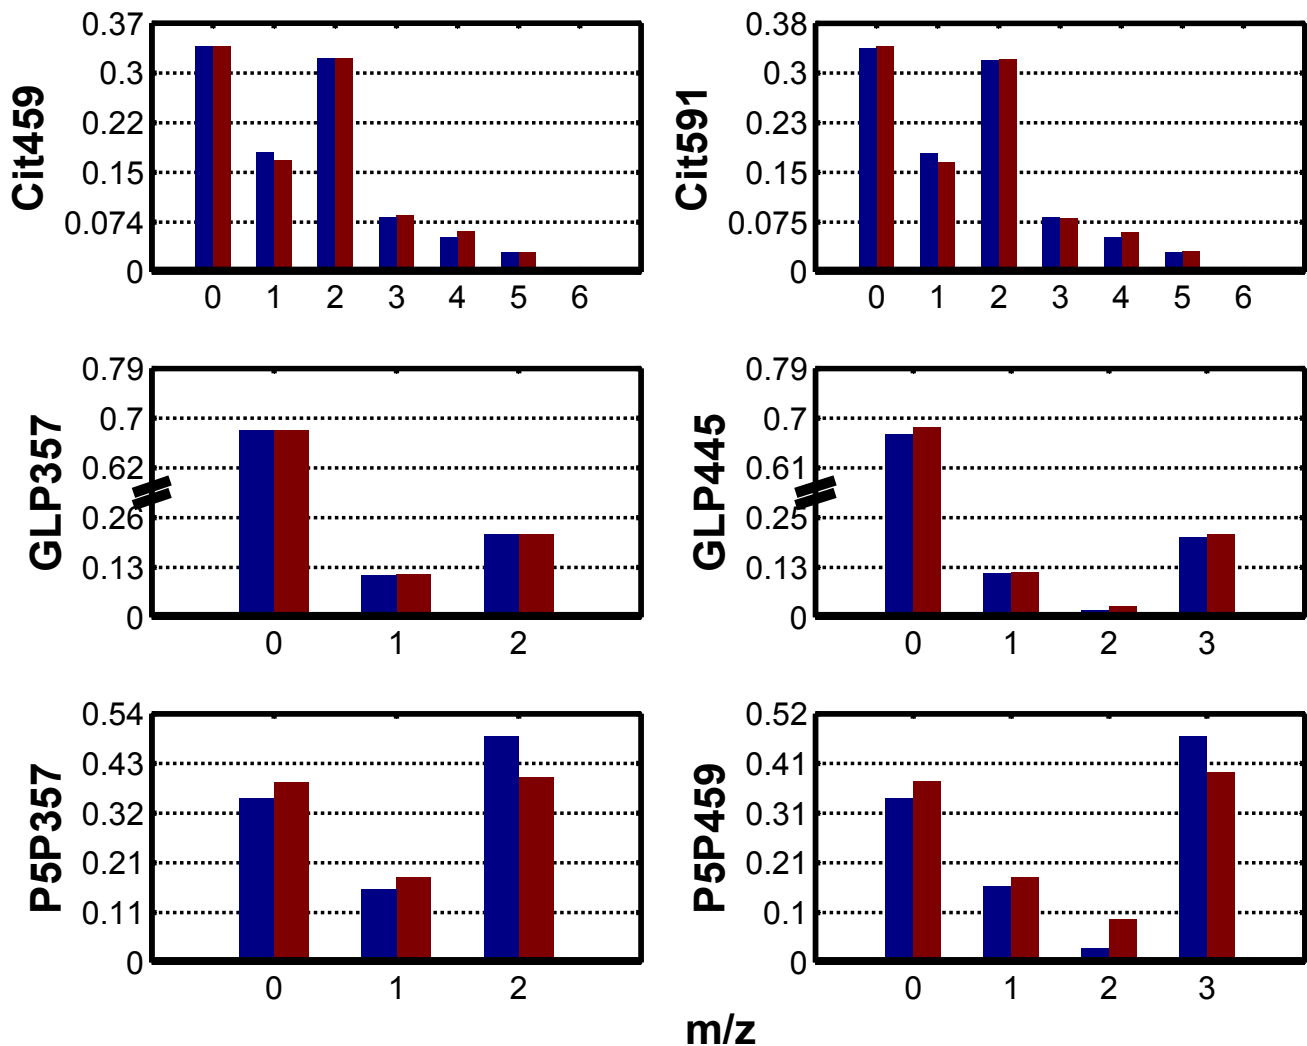

Supplementary Figure 2B: Simulated and measured MID values from MFA model using A549 cells cultured with a 1:1 mixture of [U-<sup>13</sup>C<sub>6</sub>]glucose and [1-<sup>13</sup>C]glucose. Simulated values (blue) were obtained using Metran and the model fit (fluxes) listed in Supplementary Table 3. For measured values (red), labeling was determined via GC/MS and corrected for natural isotope abundance.



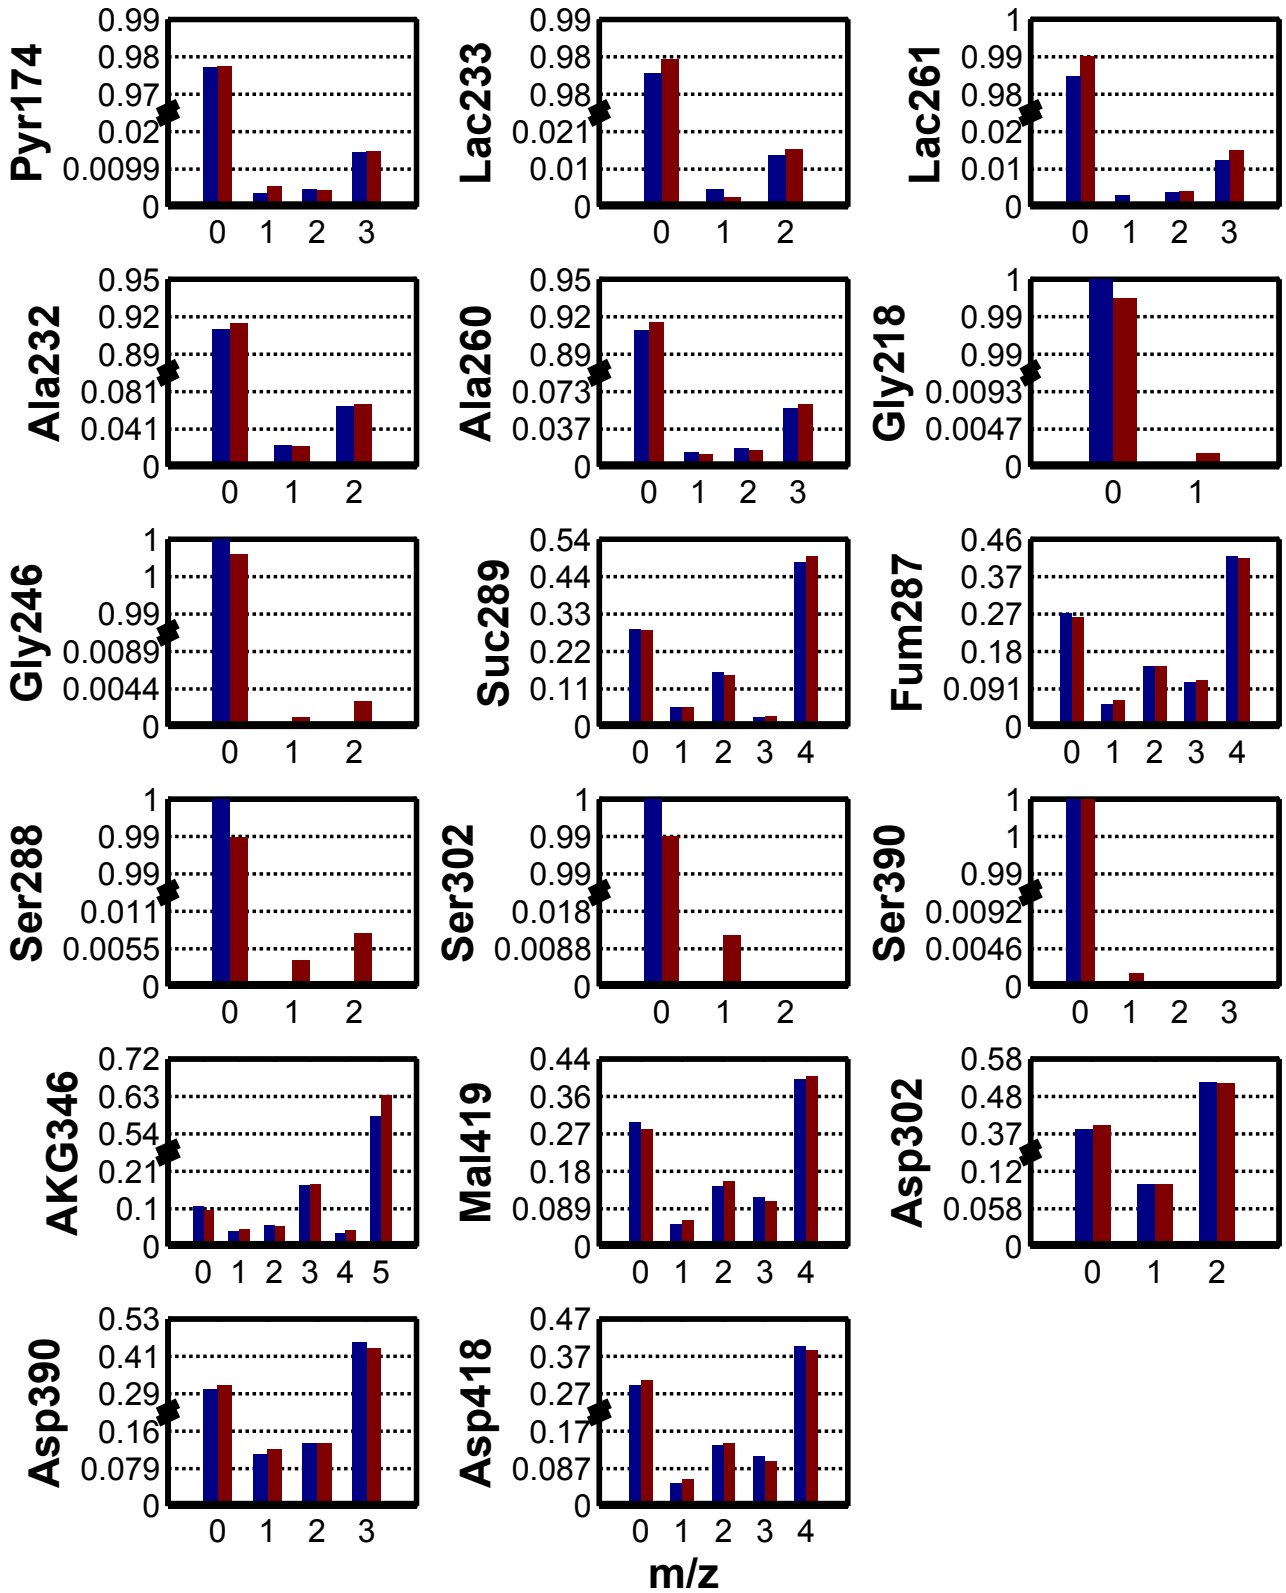

Supplementary Figure 3: Simulated and measured MID values from MFA model using A549 cells cultured with unlabeled glucose and [U-13C5]glutamine. Simulated values (blue) were obtained using Metran and the model fit (fluxes) listed in Supplementary Table 3. For measured values (red), labeling was determined via GC/MS and corrected for natural isotope abundance.

**Supplementary Table 3: Mass isotopomer distribution measurements and standard errors used for experimental validation**

| Ion          | [1,2-13C2]gluc+[U-13C5]gln |       | [1-13C]gluc+[U-13C6]gluc |       | [U-13C5]gln |       |
|--------------|----------------------------|-------|--------------------------|-------|-------------|-------|
|              | Average                    | SEM   | Average                  | SEM   | Average     | SEM   |
| Pyr_174 (M0) | 42.66%                     | 0.50% | 24.31%                   | 0.50% | 83.21%      | 0.50% |
| Pyr_175 (M1) | 7.61%                      | 0.50% | 21.96%                   | 0.50% | 10.72%      | 0.50% |
| Pyr_176 (M2) | 40.85%                     | 0.50% | 6.32%                    | 0.50% | 4.23%       | 0.50% |
| Pyr_177 (M3) | 6.74%                      | 0.50% | 41.81%                   | 0.50% | 1.63%       | 0.50% |
| Pyr_178 (M4) | 1.93%                      | 0.50% | 3.77%                    | 0.50% | 0.15%       | 0.50% |
| Lac_233 (M0) | 38.41%                     | 0.50% | 22.77%                   | 0.50% | 74.21%      | 0.50% |
| Lac_234 (M1) | 11.00%                     | 0.50% | 21.96%                   | 0.50% | 16.21%      | 0.50% |
| Lac_235 (M2) | 39.38%                     | 0.50% | 42.38%                   | 0.50% | 8.04%       | 0.50% |
| Lac_236 (M3) | 7.54%                      | 0.50% | 8.92%                    | 0.50% | 1.23%       | 0.50% |
| Lac_237 (M4) | 3.18%                      | 0.50% | 3.44%                    | 0.50% |             |       |
| Lac_261 (M0) | 37.62%                     | 0.50% | 21.26%                   | 0.50% | 73.13%      | 0.50% |
| Lac_262 (M1) | 10.34%                     | 0.50% | 21.13%                   | 0.50% | 16.67%      | 0.50% |
| Lac_263 (M2) | 37.78%                     | 0.50% | 8.32%                    | 0.50% | 7.33%       | 0.50% |
| Lac_264 (M3) | 9.88%                      | 0.50% | 38.11%                   | 0.50% | 2.28%       | 0.50% |
| Lac_265 (M4) | 3.63%                      | 0.50% | 7.42%                    | 0.50% |             |       |
| Ala_232 (M0) | 36.00%                     | 0.50% | 31.89%                   | 0.50% | 68.83%      | 0.50% |
| Ala_233 (M1) | 11.27%                     | 0.50% | 21.67%                   | 0.50% | 16.78%      | 0.50% |
| Ala_234 (M2) | 40.94%                     | 0.50% | 35.75%                   | 0.50% | 11.72%      | 0.50% |
| Ala_235 (M3) | 8.12%                      | 0.50% | 7.51%                    | 0.50% | 2.04%       | 0.50% |
| Ala_236 (M4) | 3.25%                      | 0.50% | 2.77%                    | 0.50% |             |       |
| Ala_260 (M0) | 35.29%                     | 0.50% | 30.77%                   | 0.50% | 67.97%      | 0.50% |
| Ala_261 (M1) | 10.22%                     | 0.50% | 20.85%                   | 0.50% | 16.59%      | 0.50% |
| Ala_262 (M2) | 33.22%                     | 0.50% | 8.64%                    | 0.50% | 7.83%       | 0.50% |
| Ala_263 (M3) | 15.55%                     | 0.50% | 30.77%                   | 0.50% | 5.98%       | 0.50% |
| Ala_264 (M4) | 4.46%                      | 0.50% | 6.03%                    | 0.50% | 1.17%       | 0.50% |
| Ala_265 (M5) | 1.13%                      | 0.50% | 2.57%                    | 0.50% |             |       |
| Gly_218 (M0) | 71.02%                     | 0.50% | 72.43%                   | 0.50% | 76.06%      | 0.50% |
| Gly_219 (M1) | 19.21%                     | 0.50% | 18.69%                   | 0.50% | 15.94%      | 0.50% |
| Gly_220 (M2) | 7.32%                      | 0.50% | 7.17%                    | 0.50% | 6.68%       | 0.50% |
| Gly_221 (M3) | 2.37%                      | 0.50% | 1.51%                    | 0.50% | 1.18%       | 0.50% |
| Gly_246 (M0) | 68.45%                     | 1.70% | 71.33%                   | 0.50% | 75.11%      | 0.50% |
| Gly_247 (M1) | 20.35%                     | 0.59% | 16.36%                   | 0.50% | 16.55%      | 0.50% |
| Gly_248 (M2) | 8.99%                      | 0.50% | 10.12%                   | 0.50% | 7.15%       | 0.50% |
| Gly_249 (M3) | 2.09%                      | 0.61% | 1.73%                    | 0.50% | 1.06%       | 0.50% |
| Suc_289 (M0) | 44.52%                     | 1.66% | 64.37%                   | 0.50% | 20.58%      | 0.50% |
| Suc_290 (M1) | 11.65%                     | 0.60% | 18.71%                   | 0.50% | 9.12%       | 0.50% |
| Suc_291 (M2) | 7.68%                      | 0.50% | 12.42%                   | 0.50% | 14.13%      | 0.50% |
| Suc_292 (M3) | 3.24%                      | 0.50% | 3.07%                    | 0.50% | 5.37%       | 0.50% |
| Suc_293 (M4) | 25.66%                     | 1.74% | 1.29%                    | 0.50% | 39.67%      | 0.50% |
| Suc_294 (M5) | 4.95%                      | 0.50% |                          |       | 7.52%       | 0.50% |
| Suc_295 (M6) | 2.30%                      | 0.50% |                          |       | 3.57%       | 0.50% |
| Fum_287 (M0) | 7.72%                      | 0.50% | 53.81%                   | 0.50% | 19.52%      | 0.68% |
| Fum_288 (M1) | 3.32%                      | 0.50% | 19.48%                   | 0.50% | 9.32%       | 0.50% |
| Fum_289 (M2) | 9.72%                      | 0.50% | 14.77%                   | 0.50% | 14.09%      | 0.50% |
| Fum_290 (M3) | 15.62%                     | 0.50% | 7.97%                    | 0.50% | 11.81%      | 0.50% |
| Fum_291 (M4) | 48.38%                     | 0.50% | 2.98%                    | 0.50% | 34.49%      | 0.76% |
| Fum_292 (M5) | 10.32%                     | 0.50% | 0.83%                    | 0.50% | 7.28%       | 0.50% |
| Fum_293 (M6) | 4.39%                      | 0.50% |                          |       | 3.07%       | 0.50% |
| Ser_288 (M0) | 40.43%                     | 1.08% | 38.86%                   | 0.50% | 71.70%      | 0.50% |
| Ser_289 (M1) | 14.45%                     | 0.50% | 22.07%                   | 0.50% | 19.22%      | 0.50% |
| Ser_290 (M2) | 33.97%                     | 0.70% | 29.05%                   | 0.50% | 7.86%       | 0.50% |
| Ser_291 (M3) | 8.23%                      | 0.50% | 7.15%                    | 0.50% | 1.22%       | 0.50% |
| Ser_292 (M4) | 2.93%                      | 0.50% | 2.65%                    | 0.50% |             |       |

*The minimum values used for s.e.m. was 0.5% to account for disagreement between theoretical and measured MID.*

**Supplementary Table 3 (cont): Mass isotopomer distribution measurements and standard errors used for experimental validation**

| Mass isotopomer abundances | [1,2-13C2]gluc+[U-13C5]gln |       | [1-13C]gluc+[U-13C6]gluc |       | [U-13C5]gln |       |
|----------------------------|----------------------------|-------|--------------------------|-------|-------------|-------|
| Ion                        | Average                    | SEM   | Average                  | SEM   | Average     | SEM   |
| Ser_302 (M0)               | 43.63%                     | 1.07% | 46.43%                   | 0.50% | 71.33%      | 0.50% |
| Ser_303 (M1)               | 40.33%                     | 0.85% | 14.80%                   | 0.50% | 19.72%      | 0.50% |
| Ser_304 (M2)               | 12.50%                     | 0.50% | 28.62%                   | 0.50% | 7.60%       | 0.50% |
| Ser_305 (M3)               | 3.37%                      | 0.50% | 7.02%                    | 0.50% | 1.01%       | 0.50% |
| Ser_306 (M4)               |                            |       | 3.13%                    | 0.50% |             |       |
| Ser_390 (M0)               | 36.47%                     | 0.69% | 34.76%                   | 0.50% | 64.38%      | 0.50% |
| Ser_391 (M1)               | 14.78%                     | 0.50% | 21.73%                   | 0.50% | 22.60%      | 0.50% |
| Ser_392 (M2)               | 33.02%                     | 0.67% | 10.36%                   | 0.50% | 10.46%      | 0.50% |
| Ser_393 (M3)               | 10.94%                     | 0.50% | 22.89%                   | 0.50% | 2.36%       | 0.50% |
| Ser_394 (M4)               | 4.27%                      | 0.50% | 6.93%                    | 0.50% |             |       |
| Ser_395 (M5)               |                            |       | 2.94%                    | 0.50% |             |       |
| Akg_346 (M0)               | 2.53%                      | 0.50% | 52.94%                   | 0.51% | 6.87%       | 0.50% |
| Akg_347 (M1)               | 1.25%                      | 0.50% | 19.16%                   | 0.50% | 4.95%       | 0.50% |
| Akg_348 (M2)               | 2.25%                      | 0.50% | 16.56%                   | 0.50% | 5.46%       | 0.50% |
| Akg_349 (M3)               | 6.45%                      | 0.50% | 6.30%                    | 0.50% | 13.62%      | 0.50% |
| Akg_350 (M4)               | 6.42%                      | 0.50% | 3.57%                    | 0.50% | 6.42%       | 0.50% |
| Akg_351 (M5)               | 61.73%                     | 0.50% | 1.21%                    | 0.50% | 47.49%      | 0.92% |
| Akg_352 (M6)               | 12.80%                     | 0.50% |                          |       | 10.00%      | 0.50% |
| Akg_353 (M7)               | 5.80%                      | 0.50% |                          |       | 4.53%       | 0.50% |
| Mal_419 (M0)               | 4.90%                      | 0.50% | 42.11%                   | 0.50% | 17.60%      | 0.50% |
| Mal_420 (M1)               | 3.46%                      | 0.50% | 20.60%                   | 0.50% | 10.23%      | 0.50% |
| Mal_421 (M2)               | 9.05%                      | 0.50% | 17.26%                   | 0.50% | 14.28%      | 0.50% |
| Mal_422 (M3)               | 15.11%                     | 0.50% | 11.27%                   | 0.50% | 11.71%      | 0.50% |
| Mal_423 (M4)               | 44.78%                     | 0.50% | 4.47%                    | 0.50% | 30.86%      | 0.58% |
| Mal_424 (M5)               | 14.36%                     | 0.50% | 3.18%                    | 0.50% | 9.76%       | 0.50% |
| Mal_425 (M6)               | 6.64%                      | 0.50% | 0.84%                    | 0.50% | 4.43%       | 0.50% |
| Mal_426 (M7)               | 1.39%                      | 0.50% |                          |       | 0.94%       | 0.50% |
| Asp_302 (M0)               | 9.05%                      | 0.50% | 59.53%                   | 0.50% | 28.44%      | 0.92% |
| Asp_303 (M1)               | 12.97%                     | 0.50% | 21.97%                   | 0.50% | 14.51%      | 0.50% |
| Asp_304 (M2)               | 56.92%                     | 0.50% | 14.08%                   | 0.50% | 42.14%      | 0.88% |
| Asp_305 (M3)               | 14.28%                     | 0.50% | 3.31%                    | 0.50% | 10.21%      | 0.50% |
| Asp_306 (M4)               | 5.46%                      | 0.50% | 0.95%                    | 0.50% | 3.86%       | 0.50% |
| Asp_307 (M5)               | 1.06%                      | 0.50% |                          |       |             |       |
| Asp_390 (M0)               | 5.61%                      | 0.50% | 47.26%                   | 0.50% | 20.21%      | 0.63% |
| Asp_391 (M1)               | 5.66%                      | 0.50% | 24.51%                   | 0.50% | 14.79%      | 0.50% |
| Asp_392 (M2)               | 13.52%                     | 0.50% | 16.57%                   | 0.50% | 14.50%      | 0.50% |
| Asp_393 (M3)               | 49.83%                     | 0.50% | 7.52%                    | 0.50% | 33.39%      | 0.86% |
| Asp_394 (M4)               | 16.34%                     | 0.50% | 2.47%                    | 0.50% | 10.89%      | 0.50% |
| Asp_395 (M5)               | 7.34%                      | 0.50% | 0.67%                    | 0.50% | 4.75%       | 0.50% |
| Asp_396 (M6)               | 1.48%                      | 0.50% |                          |       |             |       |
| Asp_418 (M0)               | 6.36%                      | 0.50% | 46.31%                   | 0.50% | 19.27%      | 0.59% |
| Asp_419 (M1)               | 3.43%                      | 0.50% | 22.06%                   | 0.50% | 10.90%      | 0.50% |
| Asp_420 (M2)               | 8.79%                      | 0.50% | 16.36%                   | 0.50% | 14.03%      | 0.50% |
| Asp_421 (M3)               | 14.83%                     | 0.50% | 9.30%                    | 0.50% | 11.48%      | 0.50% |
| Asp_422 (M4)               | 44.03%                     | 0.50% | 4.13%                    | 0.50% | 29.54%      | 0.74% |
| Asp_423 (M5)               | 14.49%                     | 0.50% | 1.40%                    | 0.50% | 9.45%       | 0.50% |
| Asp_424 (M6)               | 6.42%                      | 0.50% | 0.43%                    | 0.50% | 4.21%       | 0.50% |
| Asp_425 (M7)               | 1.37%                      | 0.50% |                          |       | 0.94%       | 0.50% |
| Glu_330 (M0)               | 2.02%                      | 0.50% | 53.13%                   | 0.50% | 8.37%       | 0.50% |
| Glu_331 (M1)               | 1.50%                      | 0.50% | 20.44%                   | 0.50% | 6.93%       | 0.50% |
| Glu_332 (M2)               | 7.40%                      | 0.50% | 16.40%                   | 0.50% | 15.13%      | 0.50% |
| Glu_333 (M3)               | 5.91%                      | 0.50% | 6.46%                    | 0.50% | 6.75%       | 0.50% |
| Glu_334 (M4)               | 61.09%                     | 0.50% | 2.67%                    | 0.50% | 46.20%      | 0.87% |
| Glu_335 (M5)               | 15.02%                     | 0.50% | 0.65%                    | 0.50% | 11.28%      | 0.50% |
| Glu_336 (M6)               | 5.92%                      | 0.50% |                          |       | 4.43%       | 0.50% |
| Glu_337 (M7)               | 0.95%                      | 0.50% |                          |       | 0.72%       | 0.50% |

*The minimum values used for s.e.m. was 0.5% to account for disagreement between theoretical and measured MID.*

**Supplementary Table 3 (cont): Mass isotopomer distribution measurements and standard errors used for experimental validation**

| Mass isotopomer abundances | [1,2-13C2]gluc+[U-13C5]gln |       | [1-13C]gluc+[U-13C6]gluc |       | [U-13C5]gln |       |
|----------------------------|----------------------------|-------|--------------------------|-------|-------------|-------|
| Ion                        | Average                    | SEM   | Average                  | SEM   | Average     | SEM   |
| Glu_432 (M0)               | 1.75%                      | 0.50% | 47.02%                   | 0.50% | 7.18%       | 0.50% |
| Glu_433 (M1)               | 1.07%                      | 0.50% | 21.75%                   | 0.50% | 5.26%       | 0.50% |
| Glu_434 (M2)               | 2.16%                      | 0.50% | 17.69%                   | 0.50% | 5.53%       | 0.50% |
| Glu_435 (M3)               | 6.05%                      | 0.50% | 7.57%                    | 0.50% | 12.28%      | 0.50% |
| Glu_436 (M4)               | 6.51%                      | 0.50% | 3.83%                    | 0.50% | 6.91%       | 0.50% |
| Glu_437 (M5)               | 54.24%                     | 0.50% | 1.48%                    | 0.50% | 41.60%      | 0.77% |
| Glu_438 (M6)               | 17.56%                     | 0.50% |                          |       | 13.24%      | 0.50% |
| Glu_439 (M7)               | 8.35%                      | 0.50% |                          |       | 6.24%       | 0.50% |
| Glu_440 (M8)               | 1.81%                      | 0.50% |                          |       | 1.37%       | 0.50% |
|                            |                            |       |                          |       |             |       |
| Gln_431 (M0)               | 0.45%                      | 0.50% | 62.55%                   | 0.50% | 0.83%       | 0.50% |
| Gln_432 (M1)               | 0.17%                      | 0.50% | 23.37%                   | 0.50% | 0.34%       | 0.50% |
| Gln_433 (M2)               | 0.15%                      | 0.50% | 10.78%                   | 0.50% | 0.22%       | 0.50% |
| Gln_434 (M3)               | 0.29%                      | 0.50% | 2.59%                    | 0.50% | 0.38%       | 0.50% |
| Gln_435 (M4)               | 3.60%                      | 0.50% | 0.59%                    | 0.50% | 3.60%       | 0.50% |
| Gln_436 (M5)               | 62.63%                     | 0.50% |                          |       | 62.29%      | 0.50% |
| Gln_437 (M6)               | 20.43%                     | 0.50% |                          |       | 20.22%      | 0.50% |
| Gln_438 (M7)               | 9.61%                      | 0.50% |                          |       | 9.51%       | 0.50% |
| Gln_439 (M8)               | 2.09%                      | 0.50% |                          |       | 2.09%       | 0.50% |
| Gln_440 (M9)               | 0.50%                      | 0.50% |                          |       | 0.48%       | 0.50% |
|                            |                            |       |                          |       |             |       |
| Cit_459 (M0)               | 2.30%                      | 0.50% | 20.86%                   | 0.50% | 10.86%      | 0.56% |
| Cit_460 (M1)               | 1.58%                      | 0.50% | 18.28%                   | 0.50% | 8.20%       | 0.50% |
| Cit_461 (M2)               | 5.44%                      | 0.50% | 27.73%                   | 0.50% | 12.70%      | 0.50% |
| Cit_462 (M3)               | 8.51%                      | 0.50% | 15.32%                   | 0.50% | 12.93%      | 0.50% |
| Cit_463 (M4)               | 21.41%                     | 0.50% | 9.94%                    | 0.50% | 26.91%      | 0.55% |
| Cit_464 (M5)               | 24.47%                     | 0.50% | 5.10%                    | 0.50% | 16.77%      | 0.50% |
| Cit_465 (M6)               | 23.80%                     | 0.50% | 1.95%                    | 0.50% | 8.03%       | 0.50% |
| Cit_466 (M7)               | 8.18%                      | 0.50% | 0.63%                    | 0.50% | 2.67%       | 0.50% |
| Cit_467 (M8)               | 3.30%                      | 0.50% |                          |       | 0.77%       | 0.50% |
| Cit_468 (M9)               | 0.71%                      | 0.50% |                          |       |             |       |
|                            |                            |       |                          |       |             |       |
| Cit_591 (M0)               | 1.89%                      | 0.50% | 18.13%                   | 0.50% | 9.50%       | 0.52% |
| Cit_592 (M1)               | 1.60%                      | 0.50% | 17.90%                   | 0.50% | 8.10%       | 0.50% |
| Cit_593 (M2)               | 4.80%                      | 0.50% | 26.61%                   | 0.50% | 12.20%      | 0.50% |
| Cit_594 (M3)               | 7.87%                      | 0.50% | 16.62%                   | 0.50% | 12.71%      | 0.50% |
| Cit_595 (M4)               | 19.83%                     | 0.50% | 11.00%                   | 0.50% | 25.04%      | 0.50% |
| Cit_596 (M5)               | 23.96%                     | 0.50% | 6.02%                    | 0.50% | 17.73%      | 0.50% |
| Cit_597 (M6)               | 23.87%                     | 0.50% | 2.52%                    | 0.50% | 9.45%       | 0.50% |
| Cit_598 (M7)               | 10.33%                     | 0.50% | 0.90%                    | 0.50% | 3.69%       | 0.50% |
| Cit_599 (M8)               | 4.38%                      | 0.50% |                          |       | 1.19%       | 0.50% |
| Cit_600 (M9)               | 1.21%                      | 0.50% |                          |       |             |       |
|                            |                            |       |                          |       |             |       |
| Gly3P_357 (M0)             | 52.10%                     | 1.50% | 46.65%                   | 1.50% | 67.42%      | 1.50% |
| Gly3P_358 (M1)             | 15.93%                     | 1.50% | 20.60%                   | 1.50% | 19.29%      | 1.50% |
| Gly3P_359 (M2)             | 22.31%                     | 1.50% | 23.68%                   | 1.50% | 10.30%      | 1.50% |
| Gly3P_360 (M3)             | 6.28%                      | 1.50% | 6.33%                    | 1.50% | 2.25%       | 1.50% |
| Gly3P_361 (M4)             | 3.38%                      | 1.50% | 2.74%                    | 1.50% | 0.75%       | 1.50% |
|                            |                            |       |                          |       |             |       |
| Gly3P_445 (M0)             | 49.84%                     | 0.50% | 41.62%                   | 1.50% | 58.67%      | 1.50% |
| Gly3P_446 (M1)             | 18.88%                     | 1.50% | 22.09%                   | 1.50% | 21.55%      | 1.50% |
| Gly3P_447 (M2)             | 24.98%                     | 1.50% | 12.76%                   | 1.50% | 13.11%      | 1.50% |
| Gly3P_448 (M3)             | 5.73%                      | 1.50% | 17.32%                   | 1.50% | 4.53%       | 1.50% |
| Gly3P_449 (M4)             | 0.57%                      | 1.50% | 6.21%                    | 1.50% | 2.13%       | 1.50% |
|                            |                            |       |                          |       |             |       |
| R5P_357 (M0)               | 42.19%                     | 2.21% | 24.56%                   | 1.50% | 59.85%      | 1.50% |
| R5P_358 (M1)               | 18.09%                     | 1.68% | 18.54%                   | 1.50% | 17.96%      | 1.50% |
| R5P_359 (M2)               | 29.35%                     | 0.79% | 32.43%                   | 1.50% | 9.57%       | 1.50% |
| R5P_360 (M3)               | 8.03%                      | 0.59% | 10.63%                   | 1.50% | 2.47%       | 1.50% |
| R5P_361 (M4)               | 2.35%                      | 0.60% | 6.04%                    | 1.50% |             |       |
|                            |                            |       |                          |       |             |       |
| R5P_459 (M0)               | 38.62%                     | 1.50% | 19.83%                   | 1.50% | 46.35%      | 0.75% |
| R5P_460 (M1)               | 17.44%                     | 1.50% | 16.81%                   | 1.50% | 19.64%      | 1.50% |
| R5P_461 (M2)               | 27.95%                     | 1.50% | 12.36%                   | 1.50% | 14.14%      | 1.50% |
| R5P_462 (M3)               | 9.82%                      | 1.50% | 26.21%                   | 1.50% | 6.41%       | 1.50% |
| R5P_463 (M4)               | 6.17%                      | 0.78% | 11.96%                   | 1.50% | 5.29%       | 1.50% |

*The minimum values used for s.e.m. was 0.5% to account for disagreement between theoretical and measured MIDs.*

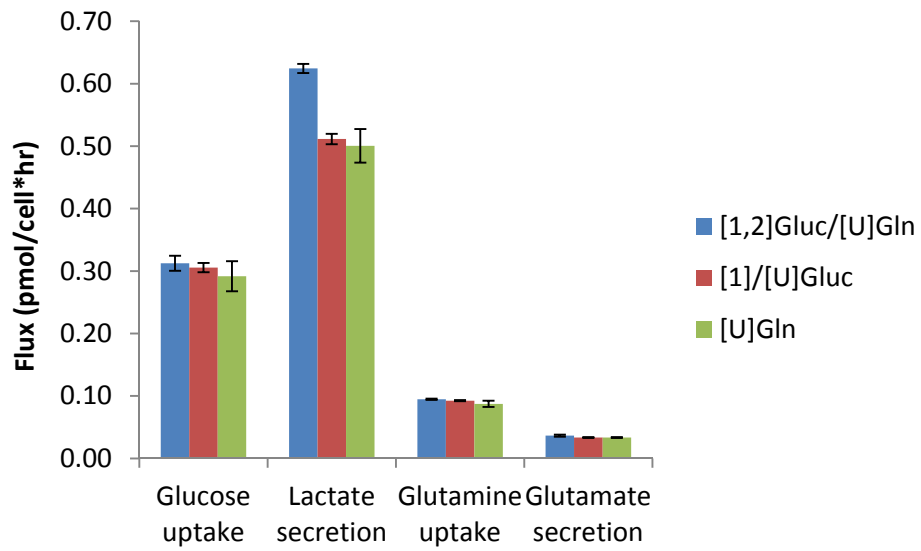

**Supplementary Figure 4:** Uptake and secretion fluxes of glucose, lactate, glutamine, and glutamate measured for each MFA experiment (n=3)

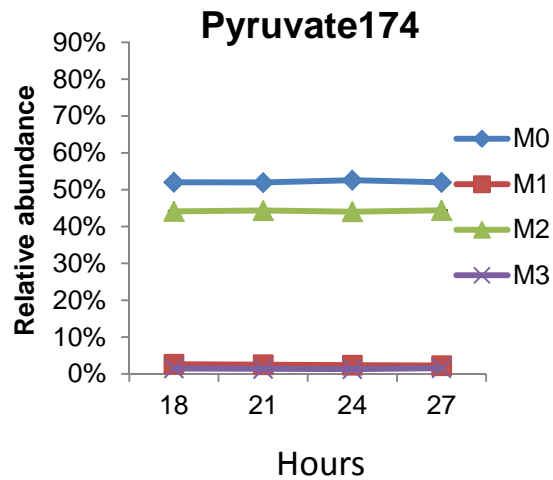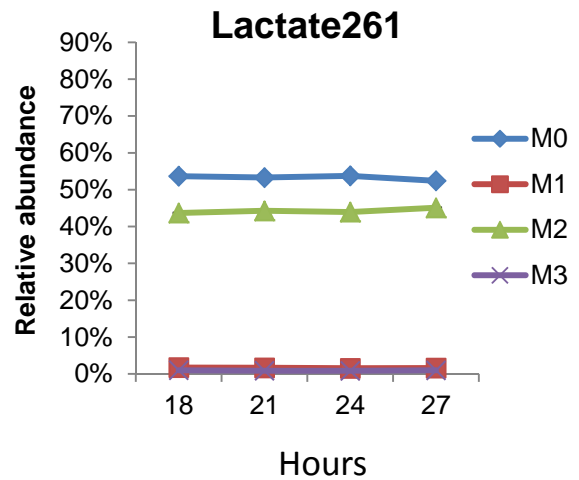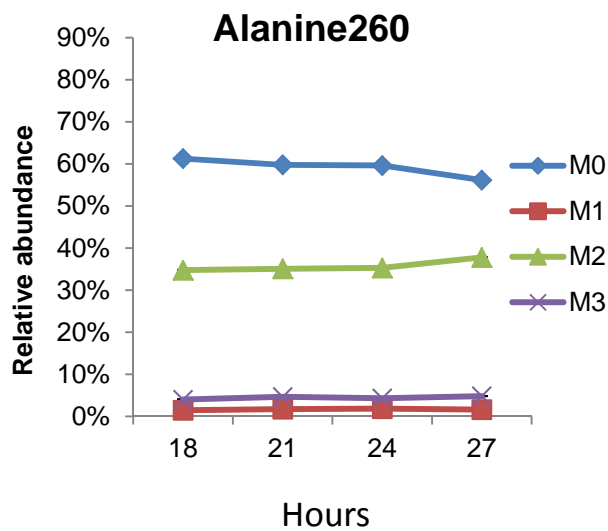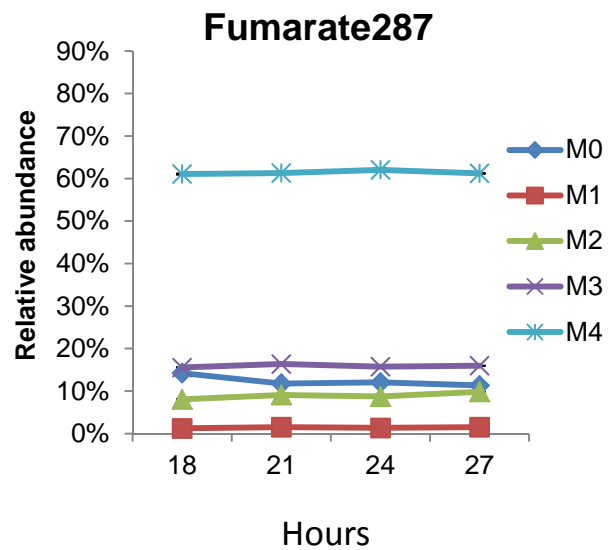

**Supplementary Figure 5:** Validation of isotopic steady state assumption when using combined [1,2-<sup>13</sup>C]glucose + [U-<sup>13</sup>C]glutamine. Cells were cultured in the presence of tracers for 18 – 27 hours, metabolites were extracted at the specified times, and MIDs were determined via GC/MS analysis.

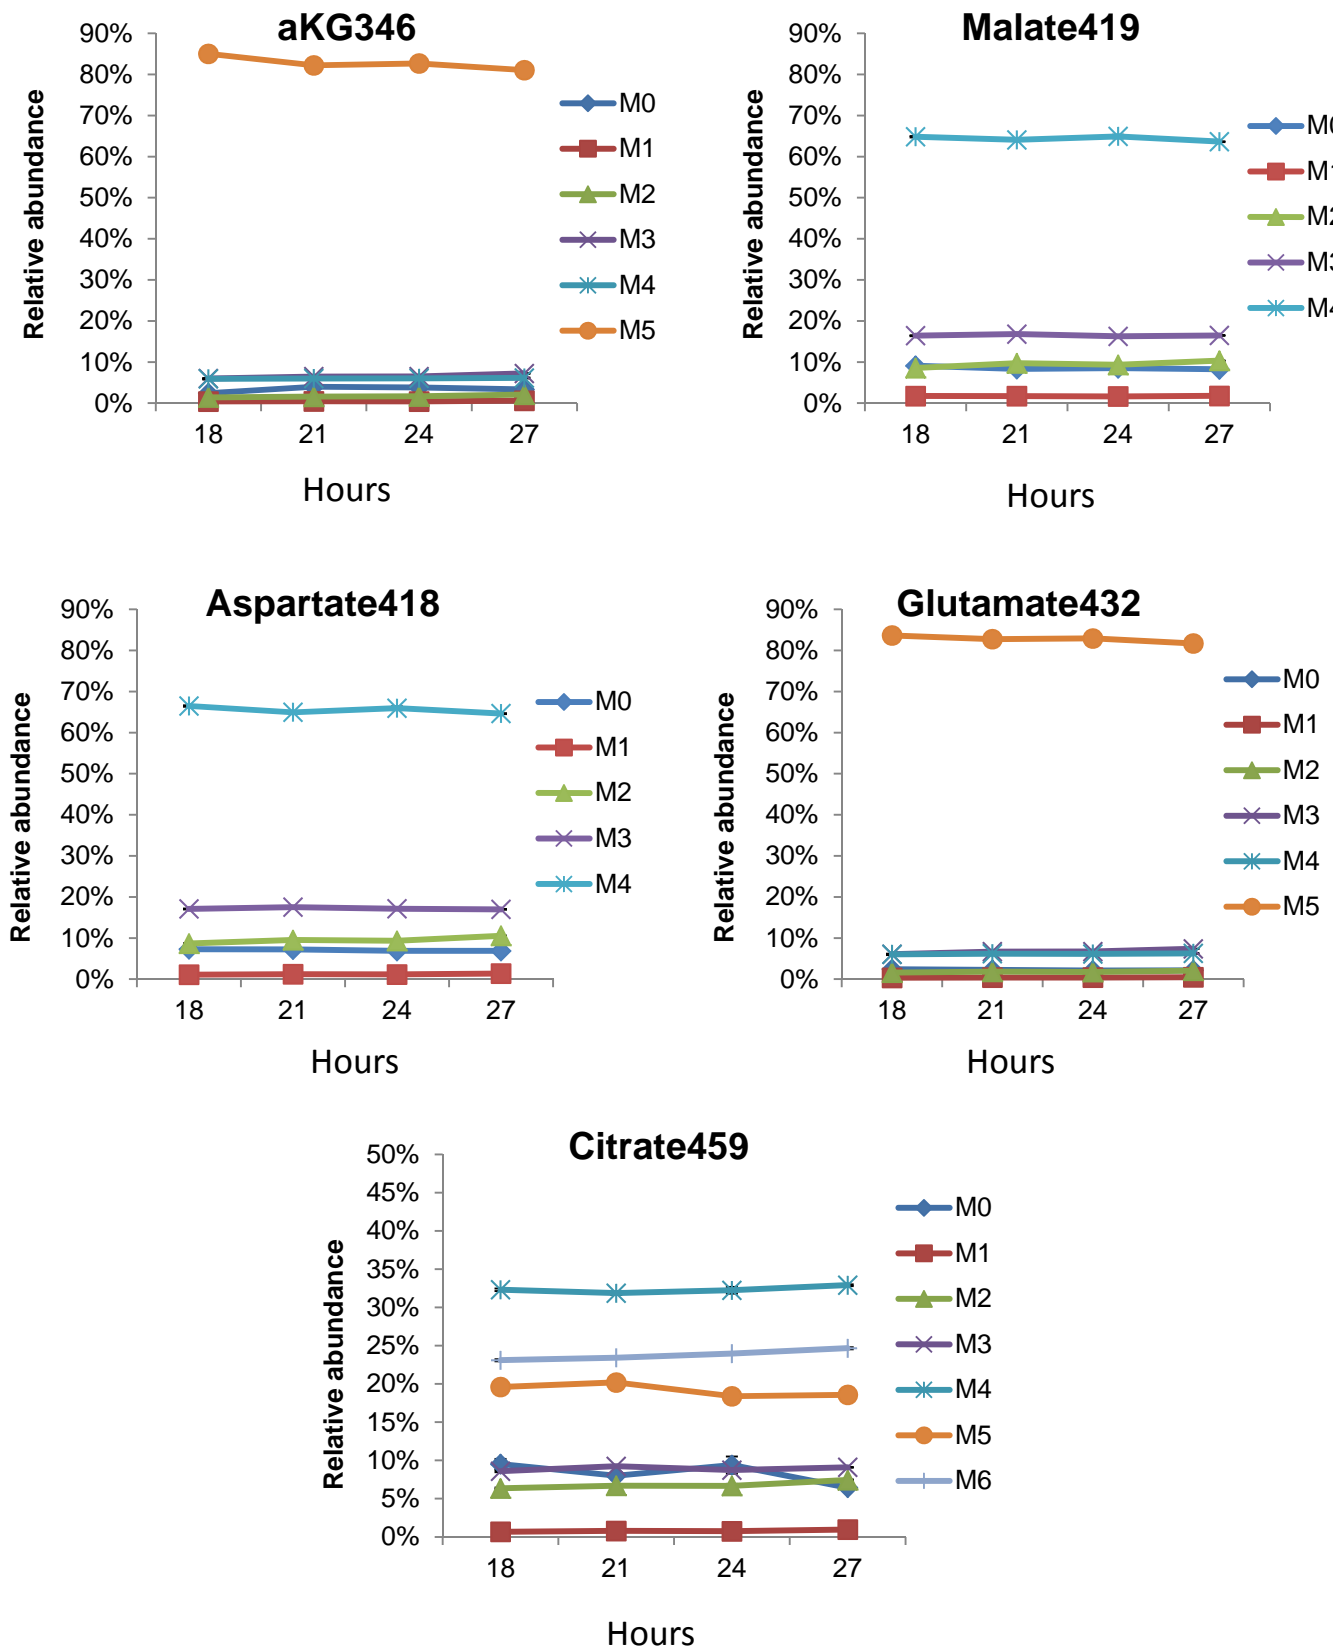

**Supplementary Figure 5 (cont):** Validation of isotopic steady state assumption when using combined [1,2-<sup>13</sup>C<sub>2</sub>]glucose + [U-<sup>13</sup>C]glutamine. Cells were cultured in the presence of tracers for 18 – 27 hours, metabolites were extracted at the specified times, and MIDs were determined via GC/MS analysis.

## Abbreviations:

Acetyl coenzyme A, AcCoA;  $\alpha$ -ketoglutarate, AKG; alanine, Ala; aspartate, Asp; citrate, Cit; fumarate, Fum; glutamine, Gln; glutamate, Glu; glycine, Gly; malate, Mal; oxaloacetate, OAA; lactate, Lac; pyruvate, Pyr, succinate, Suc; serine, Ser; glucose, Gluc; glucose-6-phosphate, G6P, fructose-6-phosphate, F6P, dihydroxyacetone phosphate, DHAP; glyceraldehyde phosphate, GAP; glycerol-3-phosphate, GLP; 3-phosphoglycerate, 3PG; pentose-5-phosphate, P5P; erythrose-4-phosphate, E4P; sedoheptulose-7-phosphate, S7P

## References

- Antoniewicz, M. R., et al., 2006. Determination of confidence intervals of metabolic fluxes estimated from stable isotope measurements. *Metab Eng.* 8, 324-37.
- Antoniewicz, M. R., et al., 2007. Elementary metabolite units (EMU): a novel framework for modeling isotopic distributions. *Metab Eng.* 9, 68-86.
- Chatham, J. C., et al., 2003. A comparison between NMR and GCMS  $^{13}\text{C}$ -isotopomer analysis in cardiac metabolism. *Mol Cell Biochem.* 249, 105-12.
- Fernandez, C. A., et al., 1996. Correction of  $^{13}\text{C}$  mass isotopomer distributions for natural stable isotope abundance. *J Mass Spectrom.* 31, 255-62.
- Maier, K., et al., 2008. Identification of metabolic fluxes in hepatic cells from transient  $^{13}\text{C}$ -labeling experiments: Part II. Flux estimation. *Biotechnol Bioeng.* 100, 355-70.
- Metallo, C. M., et al., 2009. Evaluation of  $^{13}\text{C}$  isotopic tracers for metabolic flux analysis in mammalian cells. *J Biotechnol.* 144, 167-74.
- Munger, J., et al., 2008. Systems-level metabolic flux profiling identifies fatty acid synthesis as a target for antiviral therapy. *Nat Biotechnol.*
- Noguchi, Y., et al., 2009. Effect of anaplerotic fluxes and amino acid availability on hepatic lipoapoptosis. *J Biol Chem.* 284, 33425-36.
- Young, J. D., et al., 2008. An elementary metabolite unit (EMU) based method of isotopically nonstationary flux analysis. *Biotechnol Bioeng.* 99, 686-99.
